# Supplementary material for: Aquarium Nitrification Revisited: Thaumarchaeota Are the Dominant Ammonia Oxidizers in Freshwater Aquarium Biofilters
Source: PubMed Central journal article supplement (PMC3156731; doi:10.1371/journal.pone.0023281), 2011-08-16
Supplement: pone.0023281.s001.pdf [file pone.0023281.s001.pdf]

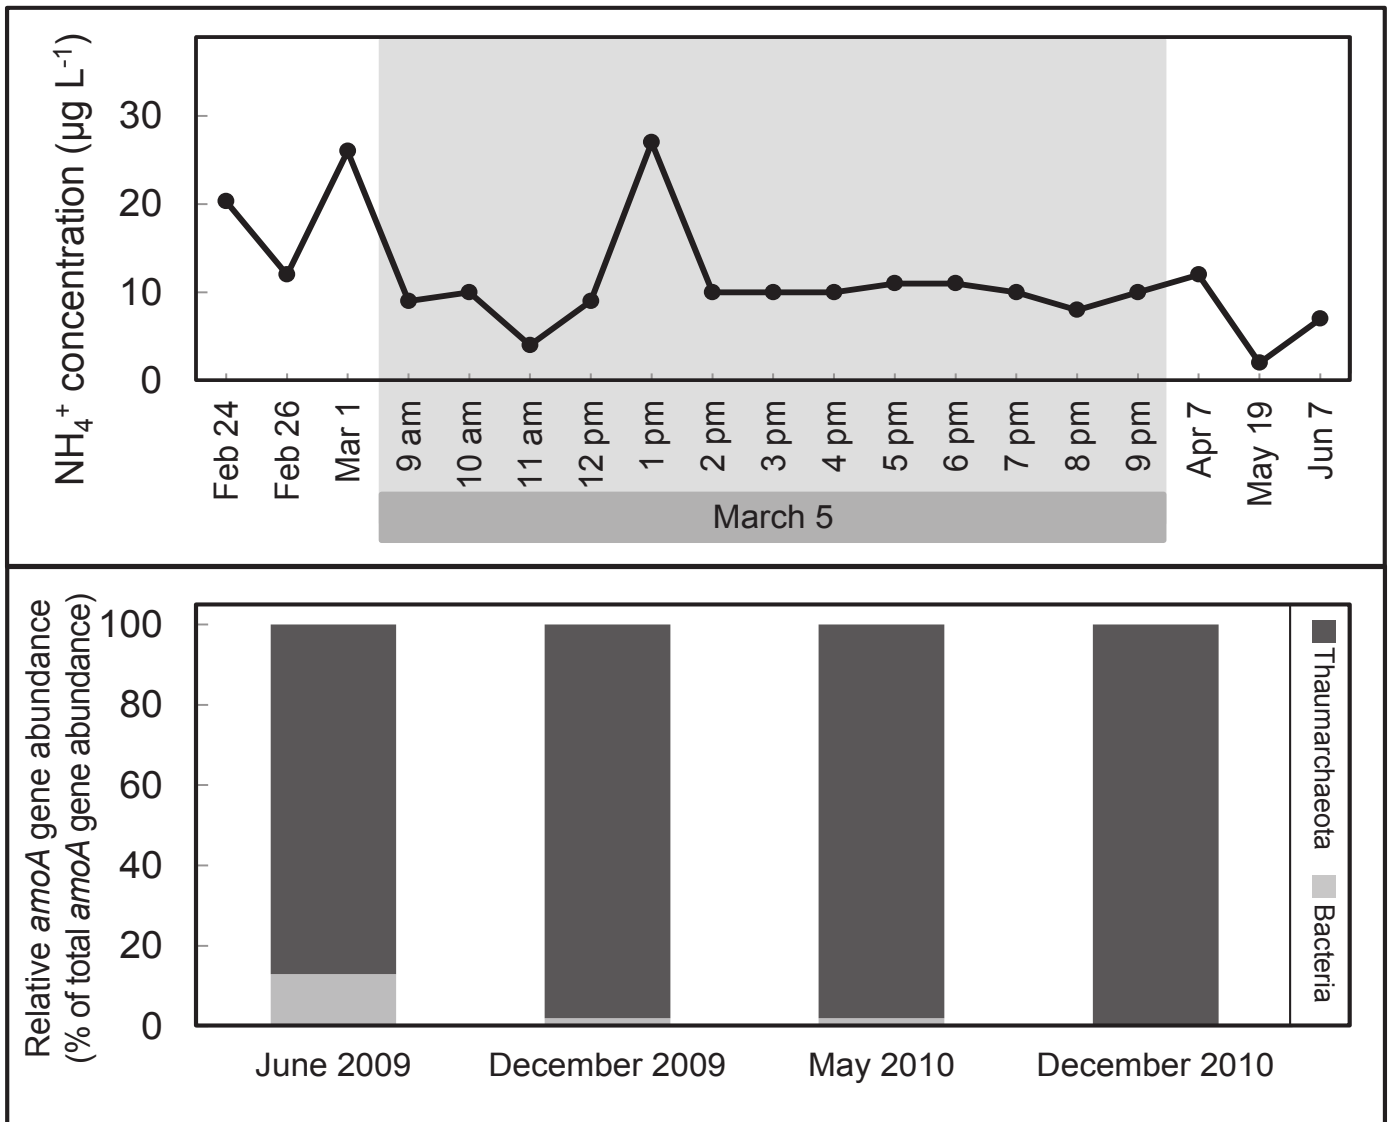

**Figure S1. Aquarium FW27 temporal patterns.** Ammonium concentrations (A) are shown over several months (during 2010), and hourly over a 12 hour period. Proportions of AOA/AOB in the FW27 sponge filter DNA extract are shown from four time points over the course of 2 years.
