# Supplementary material for: Aquarium Nitrification Revisited: Thaumarchaeota Are the Dominant Ammonia Oxidizers in Freshwater Aquarium Biofilters
Source: PubMed Central journal article supplement (PMC3156731; doi:10.1371/journal.pone.0023281), 2011-08-16
Supplement: pone.0023281.s004.pdf [file pone.0023281.s004.pdf]

**Table S3. Pearson correlation coefficients for aquarium chemistry parameters and AOA/AOB abundances for freshwater aquaria.**

|                              | % AOA<br><i>amoA</i> | % AOB<br><i>amoA</i> | NH <sub>4</sub> <sup>+</sup> | NO <sub>3</sub> <sup>-</sup> | NO <sub>2</sub> <sup>-</sup> | pH    | alkalinity | hardness | fish gallon <sup>-1</sup> |
|------------------------------|----------------------|----------------------|------------------------------|------------------------------|------------------------------|-------|------------|----------|---------------------------|
| % AOA <i>amoA</i>            | --                   |                      |                              |                              |                              |       |            |          |                           |
| % AOB <i>amoA</i>            | -1.00                | --                   |                              |                              |                              |       |            |          |                           |
| NH <sub>4</sub> <sup>+</sup> | -0.85                | 0.85                 | --                           |                              |                              |       |            |          |                           |
| NO <sub>3</sub> <sup>-</sup> | -0.04                | 0.04                 | 0.06                         | --                           |                              |       |            |          |                           |
| NO <sub>2</sub> <sup>-</sup> | -0.04                | 0.04                 | 0.48                         | 0.61                         | --                           |       |            |          |                           |
| pH                           | 0.20                 | -0.20                | -0.34                        | 0.14                         | -0.31                        | --    |            |          |                           |
| alkalinity                   | -0.20                | 0.20                 | 0.26                         | -0.16                        | -0.10                        | 0.28  | --         |          |                           |
| hardness                     | 0.05                 | -0.05                | -0.03                        | -0.09                        | 0.04                         | -0.14 | 0.07       | --       |                           |
| fish gallon <sup>-1</sup>    | -0.33                | 0.33                 | 0.61                         | -0.04                        | 0.33                         | -0.27 | 0.35       | 0.16     | --                        |

No significance  
 p < 0.05  
 p < 0.001
